# Supplementary material for: Effects of Soil Amendment with Chinese Herbal Medicine on Cassava Growth and Rhizosphere Microbial Diversity
Source: Research Square preprint supplement (doi:10.21203/rs.3.rs-907435/v1), 2021-09-24
Supplement: Supplementary file 1 [file 8273af613d21b51be364ab64.docx]

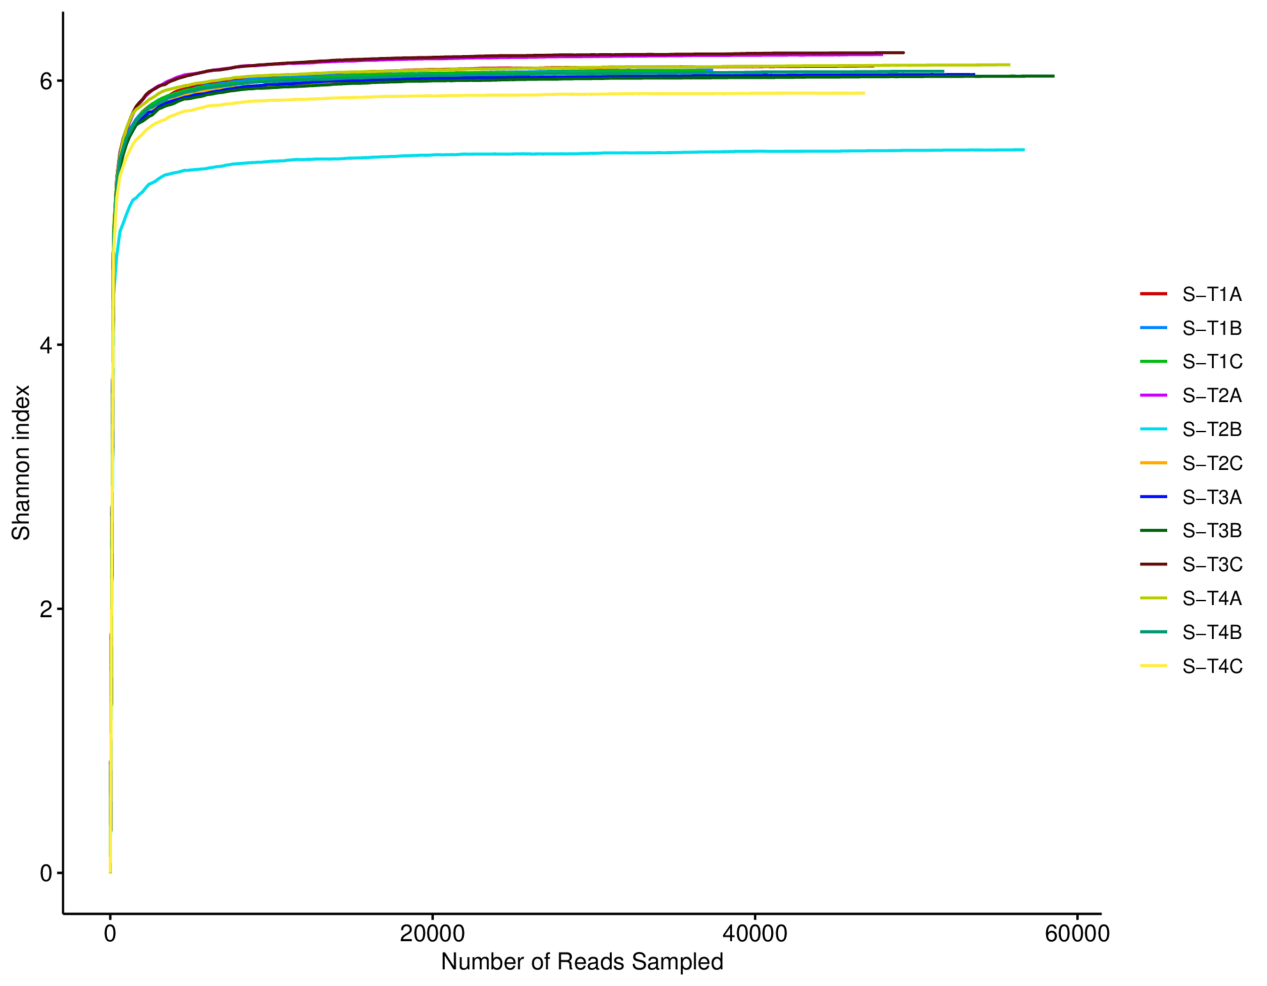


**Supplementary Fig. S1** Bacterial shannon curve based on V3-V4 regions of the 16S rRNA for high-throughput sequencing analysis


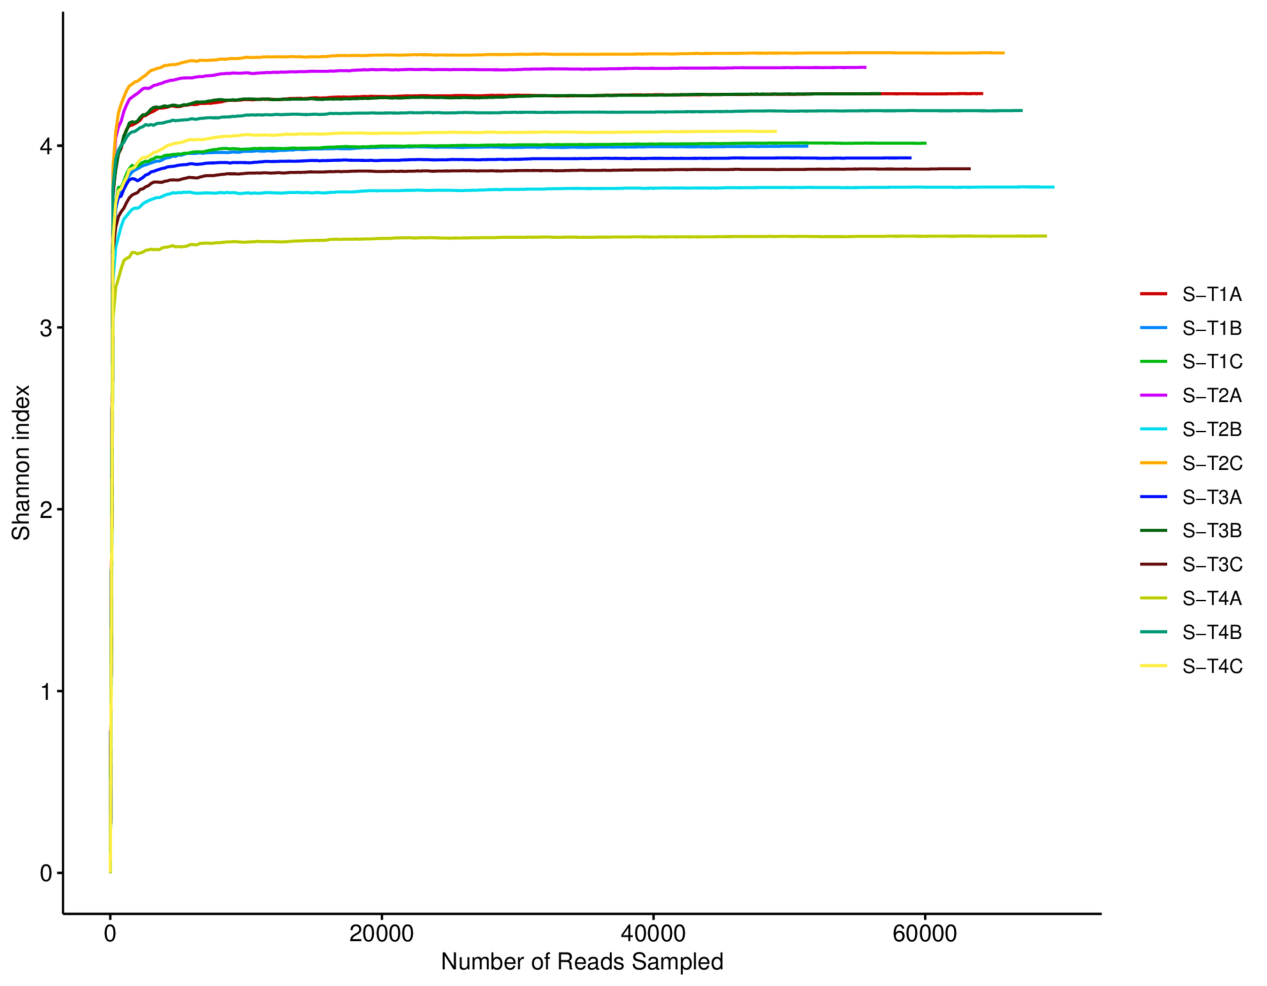


**Supplementary Fig. S2** Fungal shannon curve based on 1-2 regions of ITS for high-throughput sequencing analysis


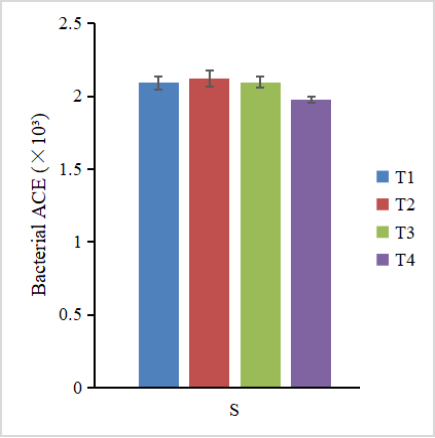


**Supplementary Fig. S3** Bacterial richness (abundance-based coverage estimator, ACE) in rhizosphere soil


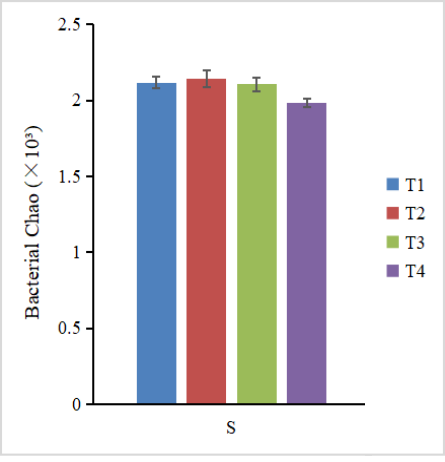


**Supplementary Fig. S4** Bacterial chao index in rhizosphere soil


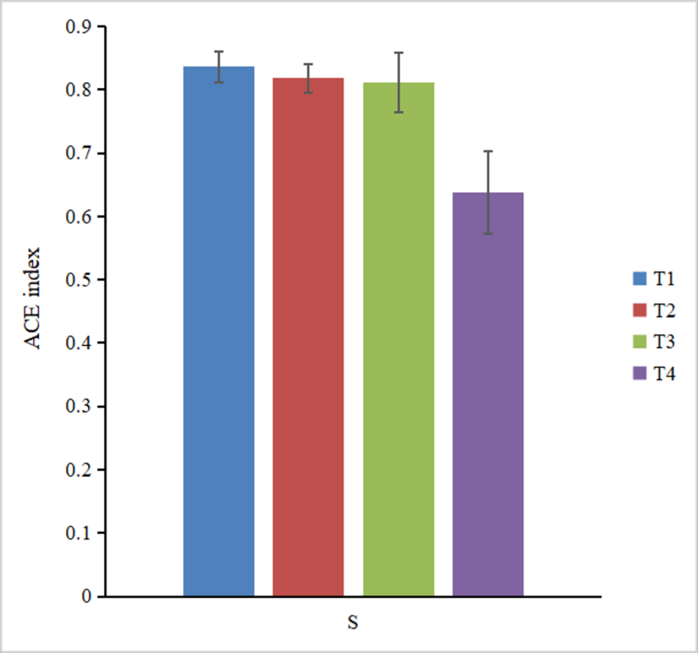


**Supplementary Fig. S5** Fungal richness (abundance-based coverage estimator, ACE) in rhizosphere soil


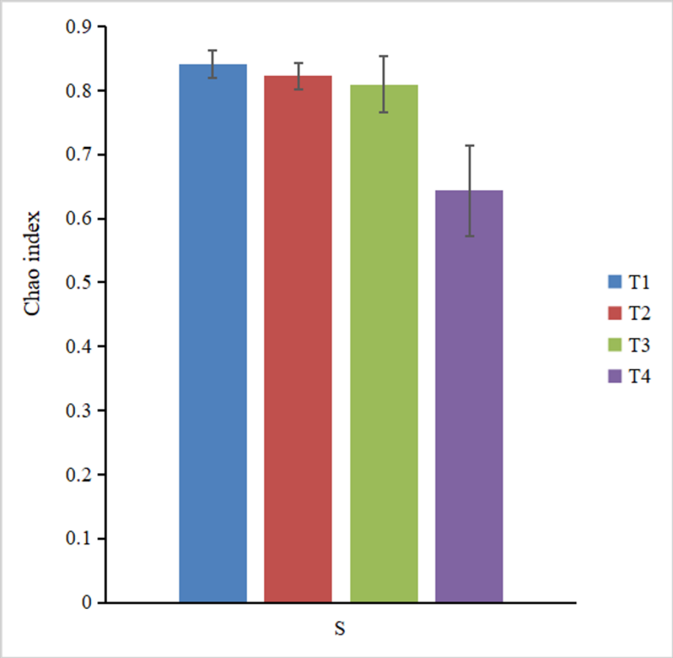


**Supplementary Fig. S6** Fungal chao index in rhizosphere soil


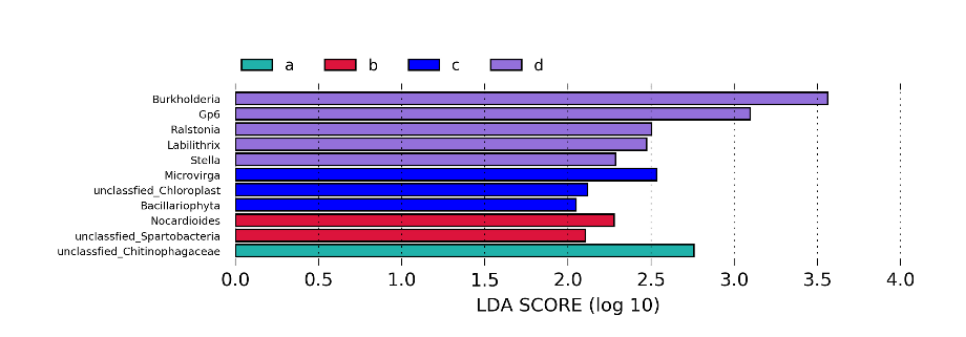


**Supplementary Fig. S7** Bar diagram of the linear discriminant analysis (LDA) distribution (LDA score threshold: ≥2) with soil bacterial communities


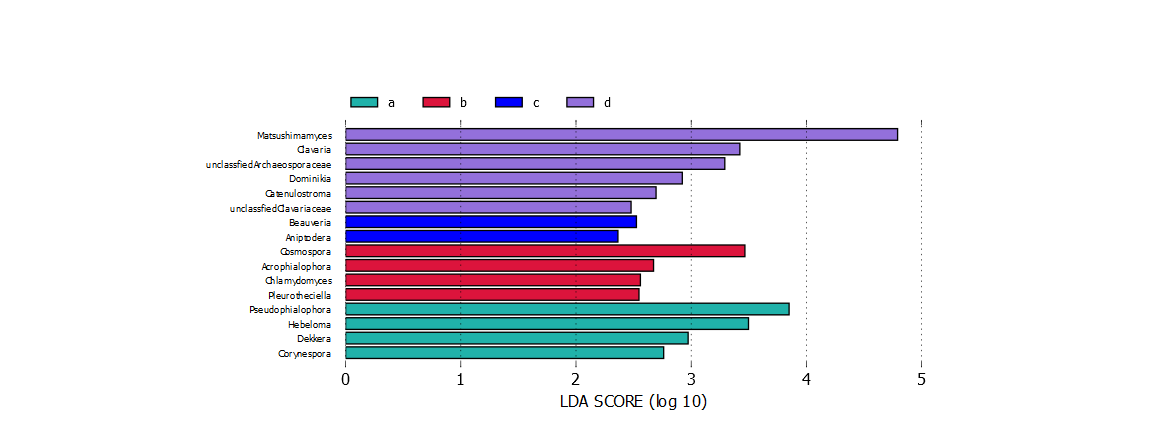
**Supplementary Fig. S8** Bar diagram of the linear discriminant analysis (LDA) distribution (LDA score threshold: ≥2) with soil fungal communities


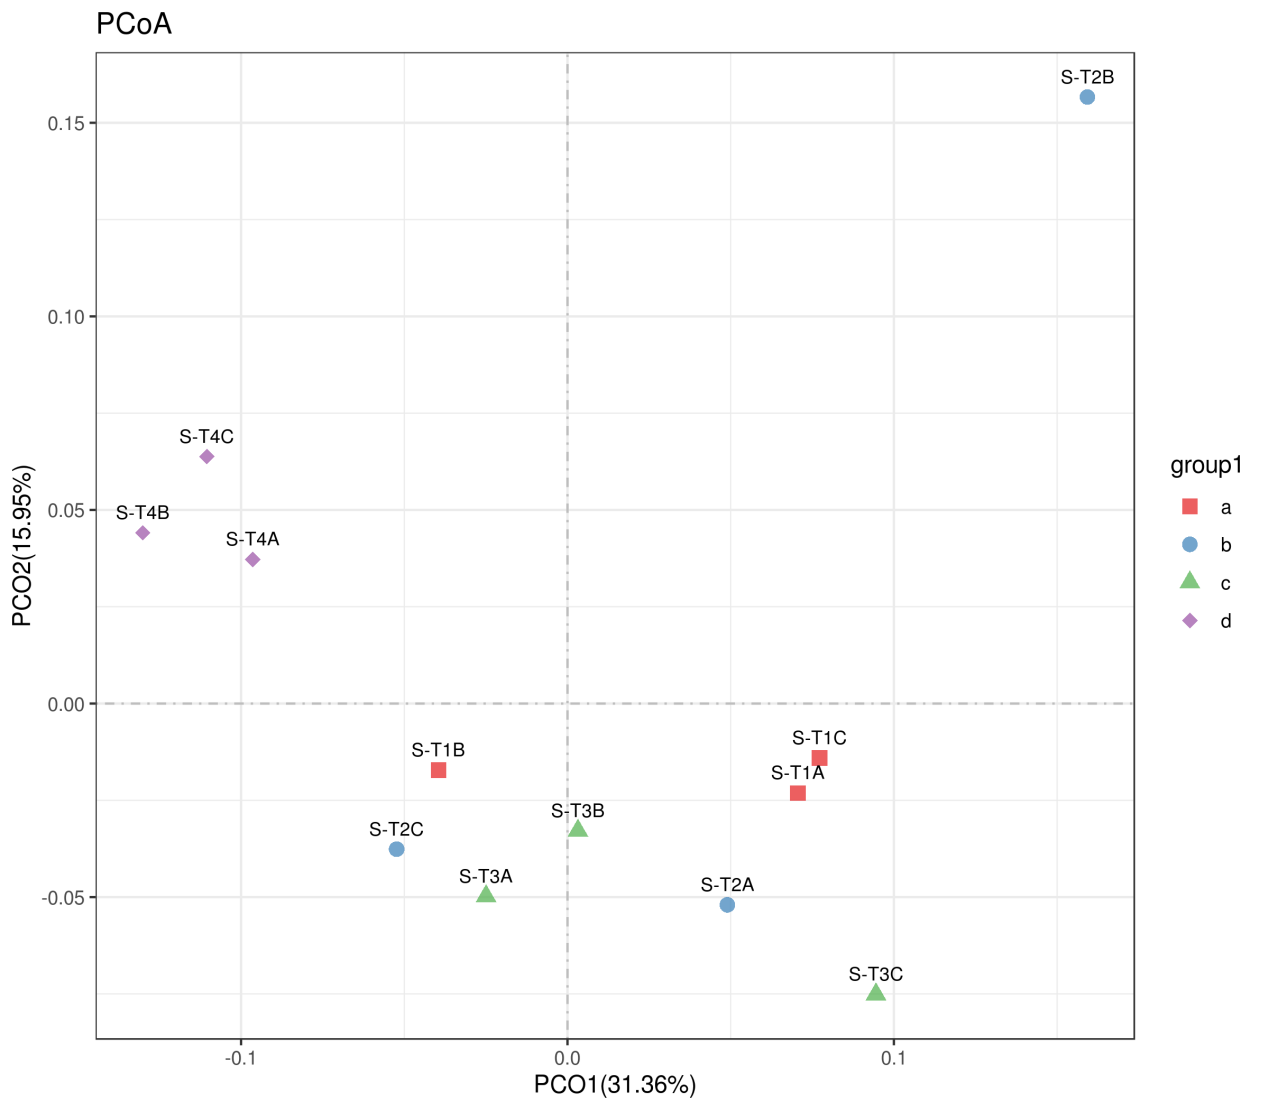


**Supplementary Fig. S9** Principal coordinates analyses (PCoA) were performed based on the soil bacterial OTU distributions using Bray-Curtis distance（a: T1; b: T2; c:T3; d: T4）


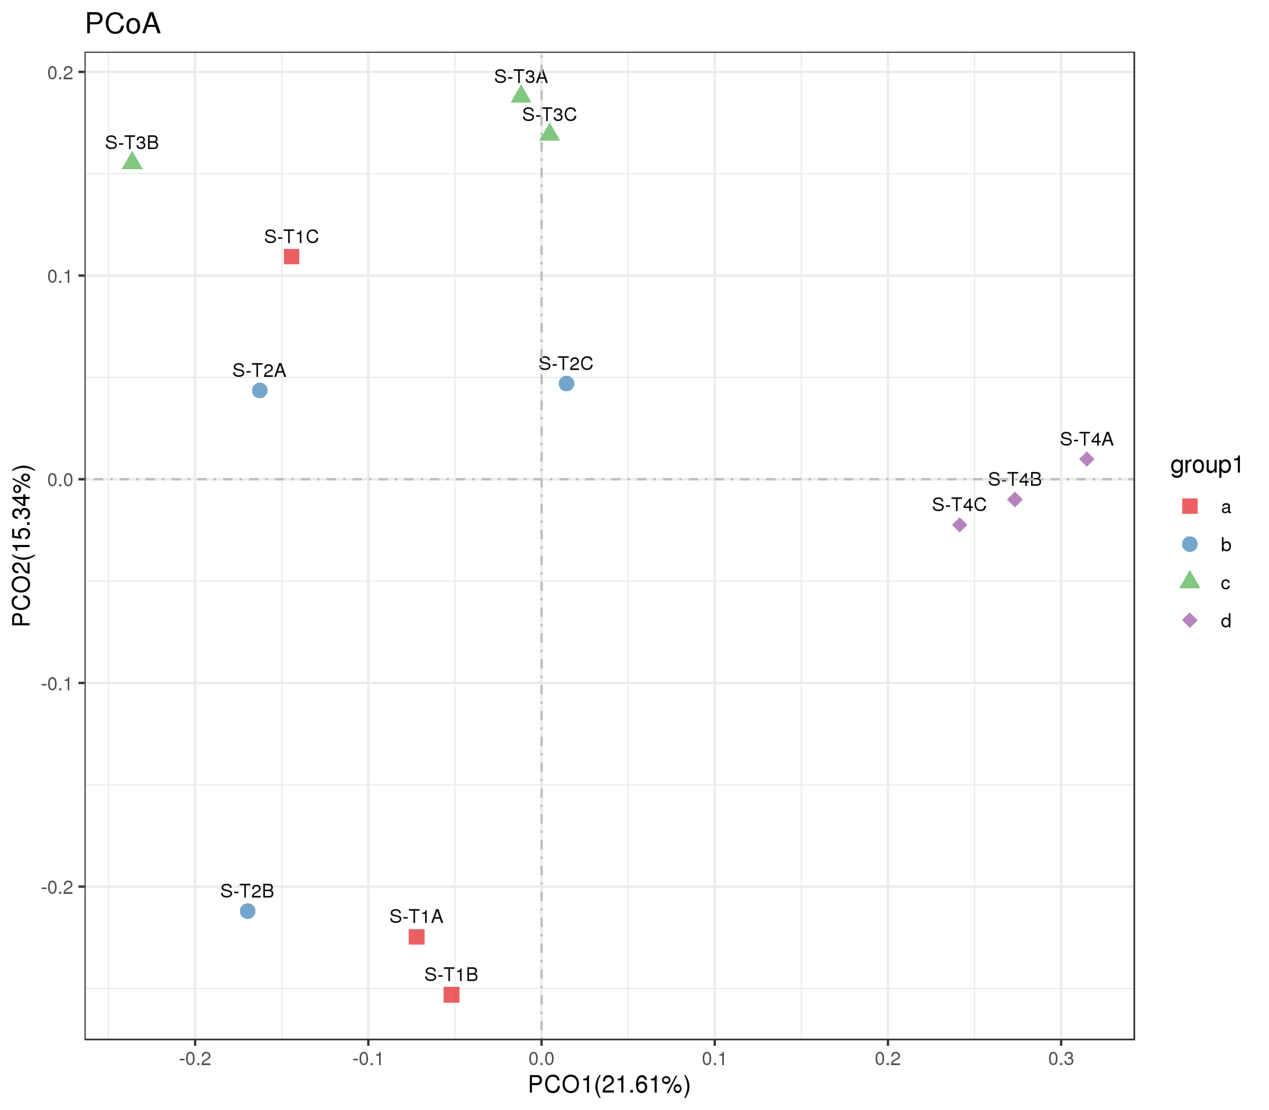


**Supplementary Fig. S10** Principal coordinates analyses (PCoA) were performed based on the soil fungus OTU distributions using Bray-Curtis distance
